# Supplementary material for: Genome-Wide Characterization of Glutamine Synthetase Family Genes in Cucurbitaceae and Their Potential Roles in Cold Response and Rootstock-Scion Signaling Communication
Source: MDPI journal article supplement (doi:10.3390/agriculture11111156), 2021-11-18
Supplement: s1 [file s1]

**Supplementary Table S3. Amino acid sequences of CmoGS and CsaGS proteins used for phylogenetic tree construction**

|         |         | gene                                                                                                                                                                                |
|---------|---------|-------------------------------------------------------------------------------------------------------------------------------------------------------------------------------------|
|         |         | ID or                                                                                                                                                                               |
|         |         | abbre                                                                                                                                                                               |
|         |         | viatio                                                                                                                                                                              |
| species | n       | amino-acid sequence                                                                                                                                                                 |
| grape   | VvGS1.1 | MALLSDLINLNLSETTEKVIVEYIWVGGSGMDLRSKARTLSGPVSDPAKLPKWNYDGSSTGQAPGEDSEVILYPQAIKDPFRRGNNILVMCDYTPAGEPIPTNKRCAAKIFSHPDVAAEVPWYGIEQYETLLQKEVKWPIGWPGVGGFPGQGPYYCGIGADKAWGRDIVDAHYKAC    |
|         |         | LYAGINISGINGEVMPGQWEYQVGPSVGISAGDELWVSRYILERITEIAGVVSFDPKPIQGDWNGAGAHTNYSTKSMRNDGGFEVIKKAIEKLGRLHKEHIAAYGEGNERRLTGRHETADINTFLWGVANRGASIRVGRDTEKAGKGYFEDRRPASNMDPYVVTSMIAETITLWKP    |
|         |         | MAHITAPSVQCQVRVPTSSFTARPMTAKLWNSLLLNQRKKGTSRSSARFRLALQSESSTVNRLKDLLNLDITPYTDKIIAEYIWGGSGIDLRSKSRITSKPVKHPSELPKWNYDGSSTGQAPGEDSEVILYPQAIKDPFRGGNNILVICDSYTPAGEPIPTNKRHGAEEFSSQKVINEV |
|         |         | PWYGIEQYETLLQTNVKWPLGWPGGYPGQGPYYCGAGADKSFGRDISDAHYKACLYAGINISGTNGEVMPGQWEYQVGPSVGIEAGDHIWCSRYILERITEQAGVVLSLDPKPIEGDWNGAGCHTNYSTKSMREDGGFEVIKAILNLSLRHEVHISAYGEGNERRLTGKHETASI     |
|         | VvGS2a  | DTFSWGVANRGCSIRVGRDTEKNGKGYLEDRRPASNMDPYVVTSLLAETITLWEPTLEAEALAAQKLSLKV                                                                                                             |
|         | VvGS1.3 | MSLLADLQNINLSDSTEKIIAEYIWGGSGMDLRSKARTLSGPVTGPAQLPKWNYDGSSTGQAPGEDSEVILYPQAIKDPFRGGNNILVMCDAYTPGGEPIPTNKRFAAKIFSHPEVTAEEPWYGIEQYETLLQKDVNWPLGWPGVGGFPGQGPYYCGIGADKAFGRDIVDAHYKACL   |
|         |         | YAGINISGINGEVMPGQWEFQVGPAVGISAGDELWVARYILERITEIAGVVVSFDPKPIKGDWNGAGAHTNYSTKSMRNTGGYDVIIKKAIEKLGRLHKEHISAYGEGNERRLTGRHETADINTFCWGVANRGASIRVGRDTEKEGKGYFEDRRPASNMDPYVVTSMIAETITLWKP   |
|         |         | MAQILAPSTQWQMRMTKNPANASPFITKMWGSLFLKQKTGTAKFSTKFRVCASKSESSTVNRLDDLNMDIRPYTDKIIAEYVWIGGTGIDLRSKSRITSKPVEHPSELPKWNYDGSSTGQAPGEDSEVILYPQAIKDPFRGGNNILVICDSYTPAGEPIPTNKRHRAAEIFNGKKVIDE |
|         |         | VPWFGIEQYETLLQPNVKWPLGWPGVGAYPGQGPYYCAAGADKSFGRDISDAHYKACLYAGINISGTNGEVMPGQWEYQVGPSVGIEAGDHIWCSRYILERITEQAGVVLTLDPKPIEGDWNGAGCHTNYSTKSMREDGGYELIKKAILNLSLRHKEHISAYGEGNERRLTGKHETAN  |
|         | VvGS2b  | INTFSWGVANRGCSVRVGRDTEKQKGYLEDRRPASNMDPYIVTSLLAETITLWEPTLEAEALAAQKLALKV                                                                                                             |
|         | VvGS1.2 | MALLSDLINLNLSDVTEKIIAEYIWGGSGMDLRSKARTLSGPVSDPHKLPKWNYDGSSTGQAPGEDSEVILYPQAIKDPFRRGNNILVMCDAYTPAGEPIPTNKRHNAAKIFSHPDVLAETWYGIEQYETLLQNSVKWPIGWPGVGGYPGQGPYYCGIGADKAFGRDIVDSHYKACL   |
| rice    | OsGS1.3 | YAGINISGINGEVMPGQWEFQVGPSVGISAGDELWVARYILERITEIAGVVVSFDPKPIQGDWNGAGAHTNYSTKSMRNDGGYEIIKKAIEKLGRLHKEHIAAYGEGNERRLTGRHETADINTFLWGVANRGASIRVGRDTEKEGKGYFEDRRPASNMDPYVVTSMIAETITLWKP    |
|         |         | MSSSLTDLVNLDLSESTDKVIAEYIWGGTGMDVRSKARTLSGPVDDPSKLPKWNFDGSSTGQATGDDSEVILHPQAIFRDPFRKGKNILVMCDCYAPNGEPIPTNNRYNAARIFSHPDVKAEEPWYGIEQYETLLQKHINWPLGWPLGGYPGQGPYYCAAGADKSYGRDIVDAHY     |
|         |         | KACLFAGINISGINAEVMPGQWEFQIGPVVGVSAGDHVWVARYILERITEIAGVVVSFDPKPIPGDWNGAGAHTNYSTKSMRSNGGYEVIKKAIEKLGMRHREHIAAYGDGNERRLTGRHETADINNFWGVANRGASVRVGRDTEKDGGKGYFEDRRPASNMDPYLVTAMIAETITL   |
|         |         | WEP SHGHGQSN GK                                                                                                                                                                     |
|         | OsGS2   | MAQAVVPAMQCQVGAVRARPAAAAAAGGRVWGVRRTRGRGTSGRFVMAVSTETTGVVTRMEQLLNMDTTPFTDKIIAEYIWGGTGIDLRSKSRITSKPVEDPSELPKWNYDGSSTGQAPGEDSEVILYPQAIKDPFRGGNNILVMCDYTPAGEPIPTNKRNAAQVSDPKVVS        |
|         |         | QVPWFQIEQYETLLQRDVNWPLGWPGGYPGQGPYYCAVGSDKSFGRDISDAHYKACLYAGINISGTNGEVMPGQWEYQVGPSVGIEAGDHIWISRYILERITEQAGVVLTLDPKPIQGDWNGAGCHTNYSTKSMREDGGFEVIKAILNLSLRHDLHISAYGEGNERRLTGLHETA     |
|         |         | SIDNFSWGVANRGCSIRVGRDTEAKGKGYLEDRRPASNMDPYVVTALLAETITLWEPTLEAEVLAACKLALKV                                                                                                           |
|         |         | MASLTDLVNLNLSDTTEKIIAEYIWGGSGMDLRSKARTLSGPVTDPSKLPKWNFDGSSTGQAPGEDSEVILYPQAIKDPFRKGNNILVMCDYTPAGEPIPTNKRHNAAKIFSSPEVASEEPWYGIEQYETLLQKDINWPLGWPGVGGFPGQGPYYCGIGADKSFGRDIVDSHYKACLY  |
|         | OsGS1.1 | AGINISGINGEVMPGQWEFQVGPSVGISAGQVWVARYILERITEIAGVVVSFDPKPIPGDWNGAGAHTNYSTKSMRNDGGYEIIKSAIEKLGRLHKEHISAYGEGNERRLTGRHETADINTFSWGVANRGASVRVGRETEQNGKGYFEDRRPASNMDPYIVTSMIAETITIIWKP     |

|                      |         |                                                                                                                                                                                      |
|----------------------|---------|--------------------------------------------------------------------------------------------------------------------------------------------------------------------------------------|
| OsGS1.2              | N       | MANLTDLVNLDSCSDKIIAEYIWVGGSGIDLRSKARTVKGPITDVSQLPKWN YDGSSTGQAPGEDSEVILYPQAIFKDPFRRGDNILVMCDCTPQGEPIPTNKRHSAAKIFSHPDVVAEVPWYGIEQEYTLQKDVNWPLGWPVGGFPGQGPYYCAAGAEKAFGRDIVDAHYKAC      |
|                      |         | IYAGINISGINGEVMPGQWEFQVGPSVGIAAADQVWVARYILERVTEVAGVVLSDLPKPIPGDWNGAGAHTNFTSKSMREPGGYEVIKKAIDKLALRHKEHIAAYGEGNERRLTGRHETADINTFKWGVANRGASIRVGRDTEKEGKGYFEDRRPASNMDPYVVTGMIAETTLWKQ     |
| ZmGS2                |         | MAQAVVPAMQCRVGVKAAAGRVWSAGRTRTGRGGASPGFKVMAVSTGSTGVVPRLEQLLNMDTPYTDK VIAEYIWVGGSGIDIRSKRTISKPVEDPSELPKWN YDGSSTGQAPGEDSEVILYPQAIFKDPFRGNNVLVICDITYPQGEPLTNKRHRAAQIFSDPKVAEQVPWFG     |
|                      |         | IEQEYTLQKDVNWPLGWPVGGFPGQGPYYCAVGADKSFGRDISDAHYKACLYAGINISGTNGEVMPGQWEYQVGPSVGIEAGDHIWISRYILERITEQAGVVLTLDPKPIQGDWNGAGCHTNYSTKTMREDGGFEEIKRAILNLSLRHDLHISAYGEGNERRLTGKHETASIGTFSW    |
| ZmGS1.2              |         | GVANRGCSIRVGRDTEAKGKGYLEDRRPASNMDPYIVTGLLAETTLWQPSLEAEALAAKKLALKV                                                                                                                    |
|                      |         | MALLSDLINLDSGRTGKIIAEYIWVGGSGMDVRSKARTLSGPVDDPSKLPKWNFDGSSTGQAPGDDSEVILCPRAIFRDPFRKGQNILVMCDCTEPNGEPIPSNKRHGAAKIFSHPDVKAEEPWFIEQEYTLQKDTKWPLGWLPGGYPGPQGPYYCAVGADKSYGRDIVDAHYKAC     |
| maize                | ZmGS1.5 | LYAGIDISGINGEVMPGQWEFQVGPVGSAGDQLWVARYILERITEIAGVVVSFDPKPIPGDWNGAGAHTNYSTKSMRSDGGYEVIKKAIGKLGLRHREHIAAYGDGNERRLTGRHETADINTFVWGVANRGASVRVGRDTEKEGKGYFEDRRPASNMDPYVVTSLIAETTMLWEP      |
|                      |         | SHSNGDGKGAAAP                                                                                                                                                                        |
| ZmGS1.3              |         | MASLTDLVNLDSDCTDRIIAEYIWVGGSGIDLRSKARVMCDCTYPQGEPIPSNKRYKAATVFSHPDVAEVPWYGIEQEYTLQKDVSWPLGWPVGGYPGPQGPYYCAAGADKAFGRDVDAHYKACLYAGINISGINGEVMPGQWEFQVGPSVGISAGDEIWVARYILERITEMA        |
|                      |         | GIVLSDLPKPIKGDWNGAGAHTNYSTKSMREAGGYEVIKAEIKLGRHREHIAAYGEGNERRLTGRHETADINTFKWGVANRGASIRVGRDTEKEGKGYFEDRRPASNMDPYVVTGMIAETTLWKGN                                                       |
| ZmGS1.4              |         | MACLTDLVNLDSDNTEKIIAEYIWIGSGMDLRSKARTLSGPVTDPSKLPKWN YDGSSTGQAPGEDSEVILYPQAIFKDPFRRGNNILVMCDCTYPAGEPIPTNKRYYNAAKIFSSPEVAAEEPWYGIEQEYTLQKDTNWPLGWPIGGFPGPQGPYYCGIGAESFGRDIVDAHYKACL   |
|                      |         | YAGINISGINGEVMPGQWEFQVGPSVGISSGDQVWVARYILERITEIAGVVVTFDPKPIPGDWNGAGAHTNYSTESMRKEGGYEVIKAAIEKLKL RHREHIAAYGEGNERRLTGRHETADINTFSWGVANRGASVRVGRETEQNGKGYFEDRRPASNMDPYVVTSMIAETTIHWKP    |
| ZmGS1.1              |         | MACLTDLVNLDSDTEKIIAEYIWIGSGMDLRSKARTLPGPVTDP SKLPKWN YDGSSTGQAPGEDSEVILYPQAIFKDPFRRGNNILVMCDCTYPAGEPIPTNKRYSAAKIFSSLEVAEEPWYGIEQEYTLQKDTNWPLGWPIGGFPGPQGPYYCGIGAESFGRDIVDAHYKACLY    |
|                      |         | AGINISGINGEVMPGQWEFQVGPSVGISSGDQVWVARYILERITEIAGVVVTFDPKPIPGDWNGAGAHTNYSTESMRKEGGYEVIKAAIEKLKL RHKEHIAAYGEGNERRLTGRHETADINTFSWGVANRGASVRVGRETEQNGKGYFEDRRPASNMDPYVVTSMIAETTIVWKP     |
| Arabidopsis thaliana | AtGS1.2 | MASLTDLVNLDSDCTDRIIAEYIWIGTGIDLRSKARTVKGPITDPSQLPKWN YDGSSTGQAPGEDSEVILYPQAIFKDPFRKGNHILVMCDCTYPQGEPIPTNKRYSAAKVFSHPDVAEVPWYGIEQEYTLQKDVSWPLGWPVGGYPGPQGPYYCAAGADKAFGRDVDAHYKA       |
|                      |         | CLYAGINISGINGEVMPGQWEFQVGPSVGISAGDEIWVARYILERITEMAGIVLSDLPKPIKGDWNGAGAHTNYSTKSMREAGGYEVIKAAIDKLGRHKEHIAAYGEGNERRLTGRHETADINTFKWGVANRGASIRVGRDTEREGKGYFEDRRPASNMDPYVVTGMIAETTLWNG     |
| AtGS1.3              |         | MSLLADLVNLDISDNSEKIIAEYIWVGGSGMDMRSKARTLPGPVTDP SKLPKWN YDGSSTGQAPGQDSEVILYPQAIFKDPFRRGNNILNVFYRFQVMCDAYTPAGEPIPTNKRHAAAEIFANPDVIAEVPWYGIEQEYTLQKDVNWPLGWPIGGFPGPQGPYYCSIGADKSFGRDIV |
|                      |         | DAHYKASLYAGINISGINGEVMPGQWEFQVGPSVGISAADDEIWIARYILERITEIAGVVVSFDPKPIPGDWNGAGAHTNYSTKSMREEGGYEIHKAEIKLGLRHKEHISAYGEGNERRLTGHHETADINTFLWGVANRGASIRVGRDTEKEGKGYFEDRRPASNMDPYVVTSMIAETTL |
| AtGS1.5              |         | MTSPLSDLLNLDLSDTKIIAEYIWIGSGMDIRSKARTLPGPVSNPTKLPKWN YDGSSTDQAAGDDSEVILYPQAIFKDPFRKGNNILVMCDAYRPAGDPIPTNRRHKAVKIFDHPNVKAEEPWFIEQEYTLKKDVKWPLGWLPGGFPGPQGPYYCAVGADKAFGRDIVDAHYKAC     |
|                      |         | LYSGLSIGGANGEVMPGQWEFQISPTVGIGAGDQLWVARYILERITEICGVIVSFDPKPIQGDWNGAAHTNFTSKSMRKDGGLD LIKEAIKKLEVKKHQHIAAYGEGNERRLTGKHETADINTFSWGVADRGASVRVGRDTEKEGKGYFEDRRPSSNMDPYLVTSMAIETTL        |
| AtGS1.3              |         | MSLLSDLVNLDATGKIIAEYIWIGSGMDIRSKARTLPGPVTDP SKLPKWN YDGSSTGQAAGEDSEVILYPQAIFKDPFRKGNNILVMCDAYTPAGDPIPTNKRHNAAKIFSHPDVAKEEPWYGIEQEYTLMQKDVNWPIGWVPGGYPGPQGPYYCGVGADKAIGRDIVDAHYKA     |
|                      |         | CLYAGIGISGINGEVMPGQWEFQVGPVEGISSGDQVWVARYLLERITEISGVIVSFDPKPIPGDWNGAGAHCNYSTKTMRNDGGLEVIKKAIGKLQLKHKEHIAAYGEGNERRLTGKHETADINTFSWGVANRGASVRVGRDTEKEGKGYFEDRRPASNMDPYVVTSMIAETTLG      |

|                |                                                                                                                                                                                       |
|----------------|---------------------------------------------------------------------------------------------------------------------------------------------------------------------------------------|
| AiGS1.4        | MSSLADLINLSDSTDQIIAEYIWIGSGLDMRSKARTLPGPVTDPSQLPKWNYDGSSTGQAPGDDSEVIIYPQAIKDPFRRGNNILVMCDAYTPAGEPIPTNKRHAAAKIFEDPSVVAETWYGIEQEYTLQKDIKWPGWPGVGGFPGPGPYPCYGVGADKAFGRDIVDSHYKACL        |
|                | YAGINVSGTNGEVMPGQWEFQVGPTVGIAAADQVWVARYILERITELAGVLSLDPKPIPGDWNGAGAHTNYSTKSMREDDGGYEVIIKAEIKLGRHKEHIAAYGEGNERRLTGKHETADINTFLWGVANRGASIRVGRDTEQAGKGYFEDRRPASNMDPYTVTSMIAESTILWKP       |
|                | MAQILAASPTCQMRVPKHSSVIASSSKLWSSVVLKQKKQSNNKVRGRVLAQSDNSTVNRVETLLNLDTKPYSDRIIAEYIWIGSGIDLRSKSRTIEKPVEDPSELPKWNYDGSSTGQAPGEDSEVILYPQAIFRDPFRGGNNILVICDTWTPAGEPIPTNKRKAAAEIFSNNKKVSGEVP  |
|                | WFGIEQEYTLQQNVKWPLGWPVGAFPGPGQPYPCYGVGADKIWRDISDAHYKACLYAGINISGTNGEVMPGQWEFQVGPSVIGDAGDHVWCARYLLERITEQAGVVLTLDPKPIEGDWNGAGCHTNYSTKSMREEGGFEVIKKAILNLSLRHKEHISAYGEGNERRLTGKHETASI      |
| AiGS2          | DQFSWGVANRGCSIRVGRDTEAKGKGYLEDRRPASNMDPYIVTSLLAETTLWEPTLEAEALAAQKLSLNV                                                                                                                |
| AiGS1.1        | MSLVSDLINLNSDSTDKIIAEYIWVGSGMDMRKARTLPGPVTDPSQLPKWNYDGSSTGQAPGEDSEVILYPQAIKDPFRRGNNILVMCDAYTPAGEPIPTNKRHAAAKVFSNPDVAAEVPWYGIEQEYTLQKDVKWPGWPGIGYPGPQGPYYCGIGADKSFGRDIVDSHYKA          |
|                | CLYAGINISGINGEVMPGQWEFQVGPAVGISAADIEWVARYILERITEIAGVVVSFDPKPIPGDWNGAGAHCNYSTKSMREEGGYEIikkaIDKLGRLHKEHIAAYGEGNERRLTGHETADINTFLWGVANRGASIRVGRDTEKEGKGYFEDRRPASNMDPYIVTSMIAETTLWNP      |
|                | MNCLLELGFSLSDAVLLSRLFCRLLSHQAPHFNASLSLSLSLSPAFAPSSASLAMSLLSDLINLNLTDSTDKIIAEYVWIGSGLDRSKARTLPGPVTDPAKLPKWNYDGSSTNQAPGDDSEVILYPQAIKDPFRRGNNILVMCDAYTPSGEPIPTNKRFAAKIFSHADVVAEEPWY      |
|                | GIEQEYTLQKDVHWPLGWPVGGFPGPGQGPYYCGTGADKAFGRDIVDAHYKACLYAGVNISGINGEVMPGQWEYQVGPTVGIAAGDQVWISRYILERITEIAGVVSFDPKPIKGDWNGAGAHTNYSTKSMRNDGGIDVIKAEIKLGRHKLHIAAYGEGNERRLTGRHETADINTF       |
| CmoCh08G004920 | SWGVANRGASVRVGRDTEQAGKGKLL                                                                                                                                                            |
| CmoCh14G017140 | MAQILAPSVQWQLRTKQTSMSASSITPKMWSLLLLKQSSKVAVKSSAKFRVLALKSDGSTINRMEELNLDVTPYTDKIIAEYIWIGSGIDLRSKSRTISKVPEHSELPKWNYDGSSTGQAPGEDSEVILYPQAIKDPFRGGNNILVICDAYTPAGEPIPTNKRHRAAEIFSNNKKVVEIIP |
|                | WYGIEQEYTLQTNVKWPLGWPVGAYPGPGQPYPCYGVGADKSFGRDISDAHYKACLYAGINISGTNGEVMPGQWEYQVGPSVIGAGDHIWCSRYILERITEQAGVVLTLDPKPIEGDWNGAGCHTNYSTKSMREEGGFDVIKKAILNLSLRHNEHISAYGEGNERRLTGKHETASIN     |
|                | TFSWGVANRGCSIRVGRDTEKQKGKGYLEDRRPASNMDPYVVTSLLAETTLWEPTLEAEALAAQKLSLKV                                                                                                                |
|                | MSSLDLINLSLCDYTDKIVAEYIWVGSGKDVRSKARTISEYVSDPSKLPKWNYDGSSTGQAPGEDSEVILYPQAIFRDPFRRGNNILVICDSYTPAGEPIPTNKRHAAAKIFSHPDVVAEEPWYGIEQEYTLQKDVKWPIGWPIGGFPGPGPYPCYAGADKTFGRDIVDAHYKACLF     |
| CmoCh15G007570 | AGVNISGINGEVMPGQWEFQVGPSVGISADELWVARYILERITEIAGVVSFDPKPIPGDWNGAGAHTNYSTKSMRKEGGYEVIIKAEIKLGRHKEHIAAYGEGNERRLTGRHETADINTFLWGVANRGASIRVGRDTEKSGKGYFEDRRPASNMDPYTVTSMIAETTLWKP           |
| pumpkin        | MSVLSDLVNLSDSTDKIVAEYIWIGSGMDLRKARTLCGPVSDPSDVPKWSYDGSSTGQASGEDSEVILYPQAIFRDPFRRGNNILVLCDAYTAAGEPIPTNKRDAAAKIFSHPDVAAEVPWYGIEQYENLLQKDGPPYPCYGVGADKAFGRDISEAHYKACLYAGINISGINGEVMPG    |
|                | QWEFQVGPSVGISAGDEMWWARYILERITEIAGVVLCFDPKPIQGDWSVACADINYSTKSMRDDGGIKVIRKAEIKLGRHKEHIAAYREGNKRRLNGQHETNDINTFSWGVANRCASVRVGRDTEKKKGKGYFEDRRLPSNMDPYVATAMIAETTLWKP                       |
|                | MSLLSDLINLNLTDTEKIIAEYVWIGSGLDRSKARTLPGPVTDPAKLPKWNYDGSSTNQATGDNSEVILHPQAVFKDPFRRGNNILVMCDAYTSAGEPIPTNRFNAAKIFSEPDVVAEEPWFIEQEYTLQKQDTRWPLGWPVGGFPGPGQGPYYCGTGADKAFGRDIVDAHYKAC       |
|                | LYAGINISGINGEVMPGQWEFQVGPTVGASGDQIWIARYILERITEMAGVVLTFDPKPVQGDWNGAGAHANYSTKSMRDDGGIEVIKAEIKLSLRHKEHIAAYGEGNERRLTGRHETADINNFSGWVANRGASVRVGRDTEKAGKGKVLRGSKASFEHGSRLRGDFHDRNRNHSVE      |
| CmoCh17G009640 | ALNRLNRTTALWLQFVSPFDAFNCS                                                                                                                                                             |
| CmoCh06G014450 | MVVGSSLYLYLPAIFIPLFIRHYRRRNPLLGLIFLPLSGTSLVQEMAQILAPSTQCQLRTKQSSMGGSPITPKMWSSLLMKQSKKGGVKSSAKFRVLALKSDGSTINRMEDLLKLDVTPYTDKIIAEYIWIGSGIDLRSKSRTISKVPEHSELPKWNYDGSSTGQAPGEDSEVILYPQAI  |
|                | FKDPRGGNNILVICDAYTPAGEPIPTNKRHRAAEIFSNNKKVVEVPWYGIEQEYTLQTNVKWPLGWPVGAYPGPGQPYPCYGVGADKSFGRDISDAHYKACLYAGINISGTNGEVMPGQWEFQVGPSVIGAGDHIWCARYILERITEQAGVVSLSLDPKPIEGDWNGAGCHTNYSTK     |
|                | SMREEGGFEVIKKAILNLSLRHKEHISAYGEGNERRLTGKHETASINSFSGWVANRGCSIRVGRDTEKEGKGYLEDRRPASNMDPYVVTSLLAESTLLWEPTLEAEALAAQKLALKV                                                                 |
|                | MSLLSDLVNLSDSTEKIIAEYIWIGSGLDIRSKARTLSGPVSDPSELPKWNYDGSSTGQAPGKDSEVILHPQAIFRDPFRRGNNILVVCDAYTPAGEPIPTNKRHAAAKIFNHPEVSAEVPWYGIEQEYTLQKDIKWPIGWPIGGFPGPGQGPYYCGVGDKAFGRDIVDAHYKACLYA    |
| CmoCh14G008450 | GVNISGINGEVMPGQWEFQVGPSVGISAGDELWVARYILERITEIAGVALSFDPKPIQGDWNGAGAHTNYSTKSMRNEGGYEVIIKAIQKLEYRHEKHIAAYGEGNERRLTGRHETADINTFSWGVANRGASVRVGRDTEKEGKGYFEDRRPASNMDPYVVTSMIAETTLWKP         |

|                |                |                                                                                                                                                                                         |
|----------------|----------------|-----------------------------------------------------------------------------------------------------------------------------------------------------------------------------------------|
| PiGS1.1-831163 |                | MSLLSDLINLNSDSTEKIIAEYLWIGGSGDIRSKARTLSGPVSDPAKLPKWNYDGSSTGQAPGQDSEVILYPQAIFRDPFRRGNNILVICDAYTPAGEIPTNKRCDAAKIFSHPEVVAEKPWYGLEQEYTLQKDVKWPLGWPIGGYPGPQGPYYCGIGVDKAFGRDIVDAHAKACLY       |
|                |                | AGINISGINGEVMPGQWEFQVGPSVGISAGDELWAARYILERITEVAGVLSFDPKPIQGDWNGAGAHTNSTESMRNEGGEYIIKKAIEKLGRLHKEHIAAYEGGNERRLTGRHETADINTFKWGVADR GASIRVGRDTEKEGKGYFEDRRPASNMDPYVVTSMIAETTILWKP          |
|                |                | MSLLSDLINLNSDSTEKIIAEYIWVGSGMDIRSKGRTLPGPVSDPSKLPKWNYDGSSTGQAPGEDSEVILYPQAIKDPFRRGNNILVICDITYTPAGEIPTNKRCKAAKIFSHPDVVAEVPWYGLEQEYTLQKDVKWPLGWPIGGYPGPQGPYYCGAGVDKAFGRDIVDAHAKACLY       |
| PiGS1.1-710678 |                | YAGINISGINGEVMPGQWEFQVGPSVGISSGDELWAARYILERITEVAGVLSFDPKPIQGDWNGAGAHTNSTKSMRNEGGEYIKKAIEKLGRLHKEHIAAYEGGNERRLTGRHETADINTFKWGVANRGASIRVGRDTEKEGKGYFEDRRPASNMDPYVVTSMIAETTILWKP           |
|                |                | MSLLNDLINLNSDTEKIIAEYLWIGGSGMDLRSKARTLPGPVTDPAKLPKWNYDGSSTGQAPGEDSEVILYPQAIKDPFRRGNNILVMCDAYTPAGEIPTNKRFAAKIFSNPAIAAEEPWFIEQEYTLQKDINWPLGWVPVGGFPGPQGPYYCGVGADKSFGRDIVDSHYKACLY         |
|                |                | AGINISGINGEVMPGQWEFQVGAIGISAGDEVWVARYILERIAEIAGVVVSFDPKPIPGDWNGAGAHTNSTKSMRNDGGFAVIKKAIEKLGRLHKEHIAAYEGGNERRLTGRHETADINTFSWGVANRGASVRVGRDTEKDGKGYFEDRRPASNMDPYVVTSMVAETTIIWKP           |
| poplar         | PiGS1.2-716066 | MSLLNDLINLNSDTEKIIAEYLWIGGSGMDLRSKARTLPGPVTDPAELPKWNFDGSSTGQAPGDDSEVILYPQSIFKDPFRRGNNILVMCDAYTPAGEIPTNKRFAAQIFSDPVVAEEPWYGIEQEYTLQKDINWPLGWVPVGGFPGPQGPYYCSVGADKSFGRDIVDAHAKACLY        |
|                |                | AGINISGINGEVMPGQWEFQVGPSVGISAGDEVWVARYILERIAELAGVVVSFDPKPIPGDWNGAGAHTNSTKSMRNEGGLAVIKKAIEKLGRLHKEHIAAYEGGNERRLTGRHETADINTFSWGVANRGASIRVGRDTEKEGKGYFEDRRPASNMDPYVVTSMIAETTIIWRP          |
|                |                | MSLLTDLINLNSDTTDKIIAEYIWVGSGMDLRSKARTLDGAVSDPQKLPKWNYDGSSTGQAPGEDSEVILYPQAIKDPFRRGNNILVMCDAYTPAGEIPTNKRHSAKIFSHPDVVAEVPWYGLEQEYTLQKDLKWPLGWVPVGGYPGPQGPYYCGAGADKAFGRDIVDSHYKA           |
| PiGS1.3-827781 |                | CLYAGINISGINGEVMPGQWEFQVGPSVGISAGDELWVARYILERITEIAGVVVSFDPKPIPGDWNGAGAHTNSTKSMRNDGGFEIHKKAIGKLQLRHKEHIAAYEGGNERRLTGRHETADIHTFSWGVANRGASVRVGRDTEKEGKGYFEDRRPASNMDPYVVTSMIAETTILWKP       |
|                |                | MSLLSDLINLNSDTTDKIIAEYIWVGSGMDLRSKARTLNGVVSDDPHKLPKWNYDGSSTGQAPGEDSEVILYPQAIKDPFRRGNNILVMCDAYTPAGEIPTNKRNYAAKIFSHPDVVAEVPWYGIEQEYTLQKDLKWPIGWVPVGGYPGPQGPYYCGAGADKAFGRDIVDSHYKA         |
|                |                | CLYAGINISGINGEVMPGQWGFQVGPSVGISAGDELWVARYILERITEIAGVVVSFDPKPIPGDWNGAGAHTNSTKSMRNDGGFEVIKKAIGKLQLKHKEHIAAYEGGNERRLTGRHETADINTFSWGVANRGASVRVGRDTEKAGKGYFEDRRPASNMDPYVVTSMIADTTILWKP       |
| PiGS1.3-834185 |                | MAQILAPSSQWQMRIAKNSAPACPMTAKMWSSLVLKQNKKGIAKSSAKFRVFAKSENSTINRMEDLLDLTPYTDKIIAEYIWIGSGIDLRSKTSRTISKPIEHPSELPKWNYDGSSTGQAPGEDSEVILYPQAIKDPFRRGNNILVMCDITYTPQGEPIPTNKRHRAAEIFSNNKVIDE     |
|                |                | VPWFIEQEYTLQTNVKWPLGWVPVGGYPGPQGPYYCGAGADKSFGRDISDAHAKACMYAGINISGTNGEVMPGQWEYQVGPSVGIDAGDHIWISRYILERITEQAGVVLSDLPKPIEGDWNGAGCHTNYSTKTMREEGGFEAIKKAILNLSLRHKEHISAYEGGNERRLTGKHETAS       |
|                |                | IdTFswGVANRGCSIRVGRETEKQGKGYLEDRRPASNMDPYIVTSLLAETTILYEPTLEAEALAAQKLSMNV                                                                                                                |
| Csa3G150160    |                | MAQILAPSTQWQLRTKLTPMSSSPITPKMWSSILLKQNKKGAVKSSSKYRVLSVRSEGGTINRMEDLLNLDVTPYTDKIIAEYIWIGSGIDLRSKTSRTISKPIEHPSELPKWNYDGSSTGQAPGEDSEVILYPQAIKDPFRRGNNILVICDAYTPAGVPIPTNKRHRAAEIFSNNKVVDEIP |
|                |                | WYGIEQEYTLQTNVKWPLGWVPVGAYPGPQGPYYCGVGADKSFGRDISDAHAKACLYAGINISGTNGEVMPGQWEYQVGPSVGIEAGDHIWISRYILERITEQAGVVLSDLPKPIEGDWNGAGCHTNYSTKSMREEGGFEVIKKAAILNLSLRHKEHISAYEGGNERRLTGKHETASINT    |
|                |                | FSWGVANRGCSIRVGRDTEKQGKGYLEDRRPASNMDPYVVTSLLAETTILWEPTLEAEALAAQKLSLKV                                                                                                                   |
| cucumber       | Csa3G304140    | MSLLSDLVNLNSDSTEKIIAEYIWVGSGMDLRSKARTLSGPVSDPSKLPKWNYDGSSTGQAPGEDSEVILYPQAIFRDPFRRGNNILVVCITYTPAGEIPTNKRHAAKIFSHPDVVAEVPWYGIEQEYTLQKDVKWPIGWPIGGFPGPQGPYYCGVGDKAFGRDIVDAHAKACLY         |
|                |                | YAGVNISGINGEVMPGQWEFQVGPSVGISAGDEIWVARYILERITEIAGVLSFDPKPIQGDWNGAGAHTNSTKSMREEGGYEVIKKAIEKLGRLHKEHIAAYEGGNERRLTGRHETADIHTFSWGVANRGASVRVGRDTEKEGKGYFEDRRPASNMDPYVVTSMVAETTILWKP          |
|                |                | MSSLSDLINLNLCDFTDKIIAEYIWVGSGKDVRSKARTISGPISDPSKLPKWNYDGSSTGQAPGQDSEVILYPQAIFRDPFRRGNNILVICDSYTPGGEIPTNKRHGAAKIFSHPDVVAEEPWYGIEQEYTLQKDVNWPIGWPIGGFPGPQGPYYCGAGADKTFGRDIVDAHAKACLYA     |
| Csa5G410730    |                | GVNISGINGEVMPGQWEFQVGPSVGISADELWVARYILERITEMAGVLSFDPKPIQGDWNGAGAHTNSTKSMRGEYEVIKKAIEKLGVRHKEHIAAYGDGNERRLTGRHETADINTFLWGVANRGASIRVGRDTEKAGKGYFEDRRPASNMDPYVTVSMIAETTILWNP               |
|                |                | MSLLSDLINLNLNTTEKIIAEYVWIGGSGDLRSKARTLPGPVTDPAKLPKWNYDGSSTNQAPGDDSEVIIYPQAVFKDPFRRGNNILVMCDAYTPAGEIPTNKRFAAKIFSNPDVVAEEPWYGIEQEYTLQKDIHWPLGWPTGGFPGPQGPYYCGTGADKAFGRDIVDSHYKACLY        |
|                |                | YAGINISGINGEVMPGQWEYQVGPVTGVIASGDQLWMSRYILERITEIAGVVVTFDPKPIQGDWNGAGAHTNSTKSMRNDGGINVIKKAIEKLSLRHKEHIAAYEGGNERRLTGRHETADINTFSWGVANRGASVRVGRDTEKAGKGYFEDRRPASNMDPYVVTSMIAETTILGKP        |
