# Supplementary material for: Genome-Wide Characterization of Glutamine Synthetase Family Genes in Cucurbitaceae and Their Potential Roles in Cold Response and Rootstock-Scion Signaling Communication
Source: MDPI journal article supplement (doi:10.3390/agriculture11111156), 2021-11-18
Supplement: s1 [file s1]

**Supplementary Table S1. The primers used for RT-PCR in this study**

| <b>ID</b>      | <b>forward/reverse</b> | <b>sequence</b>           |
|----------------|------------------------|---------------------------|
| CmoCh01G003900 | F                      | GTTGCAGAAGGACGGACCAT      |
|                | R                      | TAAGACGACGCTTGTTGCCT      |
| CmoCh06G014450 | F                      | TCTCCGGCACTTCTCTTGTG      |
|                | R                      | GCCAGGCATGACTTCTCCAT      |
| CmoCh08G004920 | F                      | TTTCACGACTTTTCTGCCGC      |
|                | R                      | TACCAAGGTTCTCCGCAAC       |
| CmoCh14G008450 | F                      | ACAAAGCCTGTTTATACGCCG     |
|                | R                      | GCAACACCCCAAGAGAAGGT      |
| CmoCh14G017140 | F                      | GTTCAATGGCAGCTGAGAACTA    |
|                | R                      | GTTGTTGCCCCACGAAATG       |
| CmoCh15G007570 | F                      | TACATTTGGGTCGGTGGCTC      |
|                | R                      | CCACCGATGGACCAACTGA       |
| CmoCh17G009640 | F                      | AAGTCATGCCTGGACAGTGG      |
|                | R                      | GAAGTACCTTGCCTTTGCCG      |
| Actin          | F                      | ATGAGCTTCGTGTTGCACCT      |
|                | R                      | TCACACTTCATGATTGAGTTGTAGG |
