# Supplementary material for: Genome-Wide Characterization of Glutamine Synthetase Family Genes in Cucurbitaceae and Their Potential Roles in Cold Response and Rootstock-Scion Signaling Communication
Source: MDPI journal article supplement (doi:10.3390/agriculture11111156), 2021-11-18
Supplement: s1 [file s1]

Supplementary Table S2. Amino acid composition of CmoGS and CsaGS proteins

| ID             | Type | pI   | Molecular  | Amino  | GRAVY  | Instability | Predicted    | Amino acid composition                                                                                               |
|----------------|------|------|------------|--------|--------|-------------|--------------|----------------------------------------------------------------------------------------------------------------------|
|                |      |      | weight     | acid   |        |             |              |                                                                                                                      |
|                |      |      | (average): | length |        | index       | localization |                                                                                                                      |
| CmoCh08G004920 | GS1  | 6.32 | 42132.78   | 387    | -0.187 | 36.92       | cytosol      | MNCLLELGFSLSDAVLLSRLFCRLLSHQAPFFHNASLSLSLSLSFAPAFSSASLAMSLLSDLINLNLTDSTDKIIAEYVWIGGSGLDLRSKARTLPGPVTDPAKLPKWNYDG     |
|                |      |      |            |        |        |             |              | GAHTNYSTKSMRNDGGIDVIKKAIEKLGLRHKLHIAAYGEGNERRLTGRHETADINTFSWGVANRGASVRVGRDTEQAGKGKLL                                 |
| CmoCh14G017140 | GS2  | 6.48 | 47702      | 432    | -0.408 | 45.01       | chloroplast  | MAQILAPSVQWQLRTKQTSMSASSITPKMWSSLLLKQSSKVAVKSSAKFRVLALKSDGSTINRMEELNLNDVTPYTDKIIAEYIWIGGSGIDLRSKSRITISKPVEHPSELPKWN  |
|                |      |      |            |        |        |             |              | GAGCHTNYSTKSMREEGGFDVIKKAILNLSLRHNEHISAYGEGNERRLTGKHETASINTFSWGVANRGCSIRVGRDTEKQKGKGYLEDRRPASNMDPYVVTSLLAETTLWE      |
| CmoCh15G007570 | GS1  | 5.88 | 39328.3    | 356    | -0.427 | 40.78       | cytosol      | MSSLSDLINLSLCDYTDK VIAEYIWVGSGGKDVRSKARTISEYVSDPSKLPKWNYDGSSTGQAPGEDSEVILYPQAIFRDPFRRGNNILVICDSYTPAGEIPTNKRHAAAKIFS  |
|                |      |      |            |        |        |             |              | LWGVANRGASIRVGRDTEKSGKGYFEDRRPASNMDPYTVTSMIAETTILWKP                                                                 |
| CmoCh01G003900 | GS1  | 5.53 | 37572.43   | 340    | -0.376 | 41.84       | cytosol      | MSVLSDLVNLDSLSDTDK VIAEYIWIGGSGMDLRSKARTLCGPVSDPSDVPKWSYDGSSTGQASGEDSEVILYPQAIFRDPFRRGNNILVLCDAYTAAGEIPTNKRDAAAKIFS  |
|                |      |      |            |        |        |             |              | GRDTEKKGKGYFEDRRLPSNMDPYVATAMIAETTILWKP                                                                              |
| CmoCh17G009640 | GS1  | 6.33 | 41914.05   | 381    | -0.438 | 38.63       | cytosol      | MSLLSDLINLNLTDTEKIIAEYVWIGGSGLDLRSKARTLPGPVTDPAKLPKWNYDGSSTNQATGDNSEVILHPQAVFKDPFRRGNNILVMCDAYTSAGEIPTNTRFNAAKIFS    |
|                |      |      |            |        |        |             |              | NFSWGVANRGASVRVGRDTEKAGKGKVLRGSKASFEHGLSRGDFHDRRNNHSVEALNRLNRTTALWLQFVSPFDAFNCS                                      |
| CmoCh06G014450 | GS2  | 8.28 | 52968.5    | 479    | -0.311 | 45.91       | chloroplast  | MVVGSSLYLYLYPAIFIPLFIRHYRRRNPLLGLIFLPLSGTSLVQEMAQILAPSTQCQLRTKQSSMGGSPITPKMWSSLLMKQSKKGGVKSSAKFRVLALKSDGSTINRMEDL    |
|                |      |      |            |        |        |             |              | EFQVGPSVGIEAGDHIWCARYILERITEQAGVVLSLDPKPIEGDWNGAGCHTNYSTKSMREEGGFEVIKKAILNLSLRHKEHISAYGEGNERRLTGKHETASINSFSWGVANR    |
| CmoCh14G008450 | GS1  | 5.7  | 39244.13   | 356    | -0.436 | 38.52       | cytosol      | MSLLSDLVNLDSLSDTEKIIAEYIWIGGSGLDIRSKARTLSGPVSDPSELPKWNYDGSSTGQAPGKDSEVILHPQAIFRDPFRRGNNILVVCDAYTPAGEIPTNKRHAAAKIFS   |
|                |      |      |            |        |        |             |              | SWGVANRGASVRVGRDTEKEGKGYFEDRRPASNMDPYVVTSMIAETTILWKP                                                                 |
| Csa3G150160    | GS2  | 7.62 | 47777.19   | 432    | -0.434 | 46.09       | chloroplast  | MAQILAPSTQWQLRTKLTPMSSSPITPKMWSSILLKQNKKGAVKSSSKYRVLSVRSEGGTINRMEDLLNLNDVTPYTDKIIAEYIWIGGSGIDLRSKSRITISKPVEHPSELPKWN |
|                |      |      |            |        |        |             |              | AGCHTNYSTKSMREEGGFEVIKKAILNLSLRHKEHISAYGEGNERRLTGKHETASINTFSWGVANRGCSIRVGRDTEKQKGKGYLEDRRPASNMDPYVVTSLLAETTLWEP      |
| Csa3G304140    | GS1  | 5.82 | 39276.32   | 356    | -0.403 | 41.35       | cytosol      | MSLLSDLVNLNLSLSDTEKIIAEYIWIGGSGMDLRSKARTLSGPVSDPSKLPKWNYDGSSTGQAPGEDSEVILYPQAIFRDPFRRGNNILVVCDTYTPAGEIPTNKRHAAAKIFS  |
|                |      |      |            |        |        |             |              | FSWGVANRGASVRVGRDTEKEGKGYFEDRRPASNMDPYVVTSMVAETTILWKP                                                                |
| Csa5G410730    | GS1  | 5.59 | 39066.87   | 356    | -0.419 | 39.02       | cytosol      | MSSLSDLINLDCDFTDKIIAEYIWVGSGGKDVRSKARTISGPISDPSKLPKWNYDGSSTGQAPGQDSEVILYPQAIFRDPFRRGNNILVICDSYTPGGEAIPNKRHGAAKIFS    |
|                |      |      |            |        |        |             |              | FLWGVANRGASIRVGRDTEKAGKGYFEDRRPASNMDPYTVTSMIAETTILWNP                                                                |
| Csa7G420690    | GS1  | 5.77 | 39118.04   | 356    | -0.442 | 41.13       | cytosol      | MSLLSDLINLDLTNTTEKIIAEYVWIGGSGLDLRSKARTLPGPVTDPAKLPKWNYDGSSTNQAPGDDSEVIIPQAVFKDPFRRGNNILVMCDAYTPAGEIPTNKRFNAAKIFS    |
|                |      |      |            |        |        |             |              | TFSWGVANRGASVRVGRDTEKAGKGYFEDRRPASNMDPYVVTSMIAETTILGKP                                                               |
