# Supplementary material for: Genome-Wide Characterization of Glutamine Synthetase Family Genes in Cucurbitaceae and Their Potential Roles in Cold Response and Rootstock-Scion Signaling Communication
Source: MDPI journal article supplement (doi:10.3390/agriculture11111156), 2021-11-18
Supplement: s1 [file s1]

**Supplementary Table S4. Regulatory elements in the 5' -upstream regions of GS genes promoter identified by Tbttools**

| ID          | type            | sequence     | location | length | sense strand/antisense strand | species                 | regulatory element                |
|-------------|-----------------|--------------|----------|--------|-------------------------------|-------------------------|-----------------------------------|
| Csa7G420690 | TGA-element     | AACGAC       | 220      | 6      | -                             | Brassica oleracea       | auxin responsiveness              |
| Csa3G150160 | TC-rich repeats | ATTCTCTAAC   | 719      | 9      | +                             | Nicotiana tabacum       | defense and stress responsiveness |
| Csa3G304140 | TC-rich repeats | ATTCTCTAAC   | 1206     | 9      | -                             | Nicotiana tabacum       | defense and stress responsiveness |
| Csa5G410730 | TC-rich repeats | GTTTCTTAC    | 129      | 9      | -                             | Nicotiana tabacum       | defense and stress responsiveness |
| Csa7G420690 | TC-rich repeats | GTTTCTTAC    | 575      | 9      | +                             | Nicotiana tabacum       | defense and stress responsiveness |
| Csa7G420690 | TC-rich repeats | ATTCTCTAAC   | 1957     | 9      | +                             | Nicotiana tabacum       | defense and stress responsiveness |
| Csa5G410730 | TCA-element     | CCATCTTTT    | 648      | 9      | -                             | Nicotiana tabacum       | salicylic acid responsiveness     |
| Csa5G410730 | TCA-element     | CCATCTTTT    | 784      | 9      | -                             | Nicotiana tabacum       | salicylic acid responsiveness     |
| Csa5G410730 | TCA-element     | CCATCTTTT    | 1107     | 9      | +                             | Nicotiana tabacum       | salicylic acid responsiveness     |
| Csa7G420690 | TCA-element     | TCAGAAGAGG   | 400      | 9      | +                             | Brassica oleracea       | salicylic acid responsiveness     |
| Csa3G150160 | ABRE            | AACCCGG      | 1232     | 7      | -                             | Arabidopsis thaliana    | abscisic acid responsiveness      |
| Csa3G304140 | ABRE            | ACGTG        | 995      | 5      | +                             | Arabidopsis thaliana    | abscisic acid responsiveness      |
| Csa7G420690 | ABRE            | CGTACGTGCA   | 1275     | 9      | -                             | Hordeum vulgare         | abscisic acid responsiveness      |
| Csa3G150160 | ARE             | AAACCA       | 931      | 6      | +                             | Zea mays                | anaerobic induction               |
| Csa3G150160 | ARE             | AAACCA       | 1423     | 6      | -                             | Zea mays                | anaerobic induction               |
| Csa3G304140 | ARE             | AAACCA       | 449      | 6      | +                             | Zea mays                | anaerobic induction               |
| Csa3G304140 | ARE             | AAACCA       | 1265     | 6      | -                             | Zea mays                | anaerobic induction               |
| Csa5G410730 | ARE             | AAACCA       | 896      | 6      | +                             | Zea mays                | anaerobic induction               |
| Csa5G410730 | ARE             | AAACCA       | 1710     | 6      | +                             | Zea mays                | anaerobic induction               |
| Csa7G420690 | ARE             | AAACCA       | 70       | 6      | +                             | Zea mays                | anaerobic induction               |
| Csa7G420690 | ARE             | AAACCA       | 727      | 6      | +                             | Zea mays                | anaerobic induction               |
| Csa7G420690 | ARE             | AAACCA       | 1104     | 6      | -                             | Zea mays                | anaerobic induction               |
| Csa7G420690 | ARE             | AAACCA       | 1228     | 6      | +                             | Zea mays                | anaerobic induction               |
| Csa5G410730 | circadian       | CAAAGATATC   | 916      | 9      | +                             | Lycopersicon esculentum | circadian control                 |
| Csa7G420690 | circadian       | CAAAGATATC   | 630      | 9      | -                             | Lycopersicon esculentum | circadian control                 |
| Csa3G304140 | G-Box           | CACGTT       | 994      | 6      | -                             | Pisum sativum           | light responsiveness              |
| Csa5G410730 | G-box           | TAACACGTAG   | 1785     | 9      | +                             | Brassica oleracea       | light responsiveness              |
| Csa7G420690 | G-box           | TACGTG       | 624      | 6      | +                             | Arabidopsis thaliana    | light responsiveness              |
| Csa3G150160 | CAT-box         | GCCACT       | 1248     | 6      | +                             | Arabidopsis thaliana    | meristem expression               |
| Csa7G420690 | CAT-box         | GCCACT       | 1380     | 6      | -                             | Arabidopsis thaliana    | meristem expression               |
| Csa7G420690 | P-box           | CCTTTTG      | 62       | 7      | +                             | Oryza sativa            | gibberellin responsiveness        |
| Csa3G150160 | GT1-motif       | GGTTAA       | 51       | 6      | +                             | Arabidopsis thaliana    | light responsiveness              |
| Csa3G304140 | GT1-motif       | GGTTAA       | 1205     | 6      | +                             | Arabidopsis thaliana    | light responsiveness              |
| Csa3G304140 | Sp1             | GGGCGG       | 1544     | 6      | +                             | Oryza sativa            | light responsiveness              |
| Csa5G410730 | GT1-motif       | GGTTAAT      | 1101     | 7      | -                             | Avena sativa            | light responsiveness              |
| Csa7G420690 | GT1-motif       | GGTTAA       | 58       | 6      | -                             | Arabidopsis thaliana    | light responsiveness              |
| Csa3G150160 | MBSI            | TTTTTACGGTTA | 44       | 11     | +                             | Petunia hybrida         | MYB binding site                  |
| Csa3G304140 | MRE             | AACCTAA      | 1202     | 7      | -                             | Petroselinum crispum    | MYB binding site                  |
| Csa3G150160 | Box 4           | ATTAAT       | 189      | 6      | +                             | Petroselinum crispum    | light responsiveness              |
| Csa3G150160 | Box 4           | ATTAAT       | 1745     | 6      | -                             | Petroselinum crispum    | light responsiveness              |
| Csa3G150160 | Box 4           | ATTAAT       | 1749     | 6      | -                             | Petroselinum crispum    | light responsiveness              |
| Csa3G304140 | Box 4           | ATTAAT       | 92       | 6      | +                             | Petroselinum crispum    | light responsiveness              |

|                |             |                 |      |     |   |                      |                              |
|----------------|-------------|-----------------|------|-----|---|----------------------|------------------------------|
| Csa3G304140    | Box 4       | ATTAAT          | 112  | 6   | + | Petroselinum crispum | light responsiveness         |
| Csa3G304140    | Box 4       | ATTAAT          | 134  | 6   | + | Petroselinum crispum | light responsiveness         |
| Csa3G304140    | Box 4       | ATTAAT          | 706  | 6   | + | Petroselinum crispum | light responsiveness         |
| Csa3G304140    | Box 4       | ATTAAT          | 1635 | 6   | - | Petroselinum crispum | light responsiveness         |
| Csa7G420690    | ATCT-motif  | AATCTAATCC      | 1557 | 9   | + | Pisum sativum        | light responsiveness         |
| Csa7G420690    | Box 4       | ATTAAT          | 10   | 6   | + | Petroselinum crispum | light responsiveness         |
| Csa7G420690    | Box 4       | ATTAAT          | 499  | 6   | + | Petroselinum crispum | light responsiveness         |
| Csa7G420690    | Box 4       | ATTAAT          | 564  | 6   | + | Petroselinum crispum | light responsiveness         |
| Csa3G150160    | GATA-motif  | GATAGGG         | 1056 | 7   | - | Pisum sativum        | light responsiveness         |
| Csa3G304140    | Gap-box     | CAAAATGAA(A/G)A | 163  | 9.5 | - | Arabidopsis thaliana | light responsiveness         |
| Csa3G304140    | TCT-motif   | TCTTAC          | 531  | 6   | + | Arabidopsis thaliana | light responsiveness         |
| Csa3G304140    | Box II      | TGGTAATAA       | 363  | 9   | + | Solanum tuberosum    | light responsiveness         |
| Csa5G410730    | I-box       | cettatcct       | 623  | 9   | - | Arabidopsis thaliana | light responsiveness         |
| Csa5G410730    | I-box       | gGATAAGGTG      | 1430 | 9   | - | Zea mays             | light responsiveness         |
| Csa5G410730    | GATA-motif  | AAGGATAAGG      | 622  | 10  | + | Solanum tuberosum    | light responsiveness         |
| Csa5G410730    | GATA-motif  | AAGGATAAGG      | 1432 | 9   | - | Solanum tuberosum    | light responsiveness         |
| Csa5G410730    | chs-CMA1a   | TTACTTAA        | 822  | 8   | - | Daucus carota        | light responsiveness         |
| Csa7G420690    | GA-motif    | ATAGATAA        | 1068 | 8   | - | Arabidopsis thaliana | light responsiveness         |
| Csa3G150160    | AE-box      | AGAAACAA        | 1128 | 8   | - | Arabidopsis thaliana | light responsiveness         |
| Csa7G420690    | TGA-box     | TGACGTAA        | 1076 | 8   | - | Glycine max          | auxin responsiveness         |
| Csa5G410730    | ABRE        | ACGTG           | 513  | 5   | - | Arabidopsis thaliana | abscisic acid responsiveness |
| Csa5G410730    | ABRE        | ACGTG           | 1788 | 5   | - | Arabidopsis thaliana | abscisic acid responsiveness |
| Csa7G420690    | ABRE        | ACGTG           | 625  | 5   | + | Arabidopsis thaliana | abscisic acid responsiveness |
| Csa7G420690    | ABRE        | ACGTG           | 1036 | 5   | - | Arabidopsis thaliana | abscisic acid responsiveness |
| Csa7G420690    | ABRE        | ACGTG           | 1277 | 5   | - | Arabidopsis thaliana | abscisic acid responsiveness |
| Csa5G410730    | G-box       | CACGTC          | 513  | 6   | + | Zea mays             | light responsiveness         |
| Csa5G410730    | G-box       | TACGTG          | 1788 | 6   | - | Arabidopsis thaliana | light responsiveness         |
| Csa7G420690    | G-box       | TACGTG          | 1036 | 6   | - | Arabidopsis thaliana | light responsiveness         |
| Csa7G420690    | G-box       | TACGTG          | 1277 | 6   | - | Arabidopsis thaliana | light responsiveness         |
| Csa7G420690    | TGACG-motif | TGACG           | 1079 | 5   | - | Hordeum vulgare      | MeJA responsiveness          |
| Csa7G420690    | TGACG-motif | TGACG           | 1469 | 5   | + | Hordeum vulgare      | MeJA responsiveness          |
| Csa7G420690    | CGTCA-motif | CGTCA           | 1079 | 5   | + | Hordeum vulgare      | MeJA responsiveness          |
| Csa7G420690    | CGTCA-motif | CGTCA           | 1469 | 5   | - | Hordeum vulgare      | MeJA responsiveness          |
| Csa3G150160    | P-box       | CCTTTTG         | 1102 | 7   | + | Oryza sativa         | gibberellin responsiveness   |
| Csa5G410730    | GTI-motif   | GGTTAA          | 1102 | 6   | - | Arabidopsis thaliana | light responsiveness         |
| Csa5G410730    | I-box       | GATAAGGGT       | 625  | 9   | + | Arabidopsis thaliana | light responsiveness         |
| CmoCh01G003900 | ABRE        | ACGTG           | 1327 | 5   | + | Arabidopsis thaliana | abscisic acid responsiveness |
| CmoCh01G003900 | TATA-box    | ATATAA          | 1190 | 6   | + | Arabidopsis thaliana | light responsiveness         |
| CmoCh01G003900 | G-box       | ACACGTGT        | 1325 | 8   | - | Brassica napus       | light responsiveness         |
| CmoCh01G003900 | CAT-box     | GCCACT          | 70   | 6   | - | Arabidopsis thaliana | meristem expression          |
| CmoCh01G003900 | CAT-box     | GCCACT          | 1400 | 6   | - | Arabidopsis thaliana | meristem expression          |
| CmoCh01G003900 | Box 4       | ATTAAT          | 54   | 6   | + | Petroselinum crispum | light responsiveness         |
| CmoCh01G003900 | Box 4       | ATTAAT          | 96   | 6   | + | Petroselinum crispum | light responsiveness         |
| CmoCh01G003900 | Box 4       | ATTAAT          | 340  | 6   | + | Petroselinum crispum | light responsiveness         |

|                |                 |            |      |   |   |                         |                                  |
|----------------|-----------------|------------|------|---|---|-------------------------|----------------------------------|
| CmoCh01G003900 | Box 4           | ATTAAT     | 409  | 6 | + | Petroselinum crispum    | light responsiveness             |
| CmoCh01G003900 | Box 4           | ATTAAT     | 1205 | 6 | - | Petroselinum crispum    | light responsiveness             |
| CmoCh01G003900 | Box 4           | ATTAAT     | 1278 | 6 | - | Petroselinum crispum    | light responsiveness             |
| CmoCh01G003900 | Box 4           | ATTAAT     | 1282 | 6 | - | Petroselinum crispum    | light responsiveness             |
| CmoCh01G003900 | Box 4           | ATTAAT     | 1384 | 6 | - | Petroselinum crispum    | light responsiveness             |
| CmoCh01G003900 | Box 4           | ATTAAT     | 1426 | 6 | - | Petroselinum crispum    | light responsiveness             |
| CmoCh01G003900 | Box 4           | ATTAAT     | 1739 | 6 | - | Petroselinum crispum    | light responsiveness             |
| CmoCh06G014450 | ABRE            | ACGTG      | 586  | 5 | + | Arabidopsis thaliana    | abscisicacid responsiveness      |
| CmoCh06G014450 | ABRE            | ACGTG      | 1408 | 5 | + | Arabidopsis thaliana    | abscisicacid responsiveness      |
| CmoCh06G014450 | ARE             | AAACCA     | 767  | 6 | + | Zea mays                | anaerobic induction              |
| CmoCh06G014450 | ARE             | AAACCA     | 870  | 6 | + | Brassica napus          | anaerobic induction              |
| CmoCh06G014450 | ARE             | AAACCA     | 1834 | 6 | + | Pisum sativum           | anaerobic induction              |
| CmoCh06G014450 | TGA-element     | AACGAC     | 882  | 6 | + | Brassica oleracea       | auxin responsiveness             |
| CmoCh06G014450 | TGA-element     | AACGAC     | 1787 | 6 | - | Brassica oleracea       | auxin responsiveness             |
| CmoCh06G014450 | circadian       | CAAAGATATC | 1655 | 9 | + | Lycopersicon esculentum | circadian control                |
| CmoCh06G014450 | TC-rich repeats | ATTCTCTAAC | 1496 | 9 | - | Nicotiana tabacum       | defenseand stress responsiveness |
| CmoCh06G014450 | TATC-box        | TATCCCA    | 474  | 7 | + | Oryza sativa            | gibberellin responsiveness       |
| CmoCh06G014450 | Sp1             | GGGCGG     | 78   | 6 | - | Oryza sativa            | light responsiveness             |
| CmoCh06G014450 | G-box           | TACGTG     | 585  | 6 | + | Zea mays                | light responsiveness             |
| CmoCh06G014450 | ACE             | CTAACGTATT | 1491 | 9 | - | Petroselinum crispum    | light responsiveness             |
| CmoCh06G014450 | TATA-box        | ATATAT     | 484  | 6 | + | Arabidopsis thaliana    | MYB binding site                 |
| CmoCh06G014450 | MBS             | CAACTG     | 1159 | 6 | - | Arabidopsis thaliana    | MYB binding site                 |
| CmoCh06G014450 | CAAT-box        | CAAAT      | 1199 | 5 | + | Arabidopsis thaliana    | MYB binding site                 |
| CmoCh06G014450 | TATA-box        | TATA       | 1704 | 4 | - | Arabidopsis thaliana    | MYB binding site                 |
| CmoCh06G014450 | CCAAT-box       | CAACGG     | 1532 | 6 | + | Hordeum vulgare         | MYB binding site                 |
| CmoCh06G014450 | GATA-motif      | GATAGGG    | 1947 | 7 | - | Pisum sativum           | light responsiveness             |
| CmoCh06G014450 | TCT-motif       | TCTTAC     | 1105 | 6 | + | Arabidopsis thaliana    | light responsiveness             |
| CmoCh06G014450 | TCCC-motif      | TCTCCCT    | 204  | 7 | + | Spinacia oleracea       | light responsiveness             |
| CmoCh06G014450 | TCCC-motif      | TCTCCCT    | 250  | 7 | + | Spinacia oleracea       | light responsiveness             |
| CmoCh06G014450 | TCCC-motif      | TCTCCCT    | 296  | 7 | + | Spinacia oleracea       | light responsiveness             |
| CmoCh06G014450 | TCCC-motif      | TCTCCCT    | 342  | 7 | + | Spinacia oleracea       | light responsiveness             |
| CmoCh06G014450 | AE-box          | AGAAACTT   | 1558 | 8 | + | Arabidopsis thaliana    | light responsiveness             |
| CmoCh06G014450 | AE-box          | AGAAACAA   | 1719 | 8 | + | Arabidopsis thaliana    | light responsiveness             |
| CmoCh08G004920 | ABRE            | TACGGTC    | 1603 | 7 | + | Arabidopsis thaliana    | abscisicacid responsiveness      |
| CmoCh08G004920 | ARE             | AAACCA     | 400  | 6 | - | Zea mays                | anaerobic induction              |
| CmoCh08G004920 | ARE             | AAACCA     | 696  | 6 | + | Zea mays                | anaerobic induction              |
| CmoCh08G004920 | ARE             | AAACCA     | 1836 | 6 | + | Zea mays                | anaerobic induction              |
| CmoCh08G004920 | TGA-element     | AACGAC     | 1209 | 6 | + | Brassica oleracea       | auxin responsiveness             |
| CmoCh08G004920 | TGA-element     | AACGAC     | 1581 | 6 | + | Brassica oleracea       | auxin responsiveness             |
| CmoCh08G004920 | TGA-element     | AACGAC     | 1764 | 6 | + | Brassica oleracea       | auxin responsiveness             |
| CmoCh08G004920 | P-box           | CCTTTTG    | 195  | 7 | - | Oryza sativa            | gibberellin responsiveness       |
| CmoCh08G004920 | P-box           | CCTTTTG    | 351  | 7 | - | Oryza sativa            | gibberellin responsiveness       |
| CmoCh08G004920 | GT1-motif       | GGTTAA     | 1332 | 6 | + | Arabidopsis thaliana    | light responsiveness             |
| CmoCh08G004920 | CAT-box         | GCCACT     | 1628 | 6 | - | Arabidopsis thaliana    | meristem expression              |

|                |                 |              |      |    |   |                         |                                  |
|----------------|-----------------|--------------|------|----|---|-------------------------|----------------------------------|
| CmoCh08G004920 | TATA-box        | TATAA        | 703  | 5  | - | Arabidopsis thaliana    | MYB binding site                 |
| CmoCh08G004920 | CCAAT-box       | CAACGG       | 1422 | 6  | + | Arabidopsis thaliana    | MYB binding site                 |
| CmoCh08G004920 | Box 4           | ATTAAT       | 1293 | 6  | - | Petroselinum crispum    | light responsiveness             |
| CmoCh08G004920 | GATA-motif      | AAGATAAGATT  | 1133 | 10 | + | Arabidopsis thaliana    | light responsiveness             |
| CmoCh08G004920 | I-box           | cCATATCCAAT  | 105  | 10 | + | Flaveria trinervia      | light responsiveness             |
| CmoCh08G004920 | LAMP-element    | CTTTATCA     | 1378 | 8  | + | Pisum sativum           | light responsiveness             |
| CmoCh08G004920 | TATA-box        | TATA         | 1392 | 4  | - | Arabidopsis thaliana    | light responsiveness             |
| CmoCh08G004920 | TCA-element     | CCATCTTTT    | 1374 | 9  | + | Nicotiana glutinosa     | salicylicacid responsiveness     |
| CmoCh08G004920 | TCA-element     | TCAGAAGAGG   | 1507 | 9  | - | Brassica oleracea       | salicylicacid responsiveness     |
| CmoCh14G008450 | ABRE            | ACGTG        | 482  | 5  | + | Arabidopsis thaliana    | abscisicacid responsiveness      |
| CmoCh14G008450 | ABRE            | GCAACGTGTC   | 801  | 9  | - | Hordeum vulgare         | abscisicacid responsiveness      |
| CmoCh14G008450 | ABRE            | ACGTG        | 804  | 5  | + | Arabidopsis thaliana    | abscisicacid responsiveness      |
| CmoCh14G008450 | ARE             | AAACCA       | 1173 | 6  | + | Zea mays                | anaerobic induction              |
| CmoCh14G008450 | TGA-element     | AACGAC       | 390  | 6  | - | Brassica oleracea       | auxin responsiveness             |
| CmoCh14G008450 | TC-rich repeats | GTTTTCTTAC   | 135  | 9  | + | Nicotiana tabacum       | defenseand stress responsiveness |
| CmoCh14G008450 | CAAT-box        | CAAAAT       | 1679 | 5  | - | Arabidopsis thaliana    | light responsiveness             |
| CmoCh14G008450 | Sp1             | GGGCGG       | 339  | 6  | - | Oryza sativa            | light responsiveness             |
| CmoCh14G008450 | G-box           | CACGTC       | 481  | 6  | - | Zea mays                | light responsiveness             |
| CmoCh14G008450 | G-box           | TAACACGTAG   | 769  | 9  | + | Brassica oleracea       | light responsiveness             |
| CmoCh14G008450 | G-box           | tgACACGTGGCA | 800  | 12 | + | Lycopersicon esculentum | light responsiveness             |
| CmoCh14G008450 | G-box           | ACACGTGGC    | 802  | 9  | + | Brassica napus          | light responsiveness             |
| CmoCh14G008450 | LTR             | CCGAAA       | 1983 | 6  | - | Hordeum vulgare         | low-temperature responsiveness   |
| CmoCh14G008450 | MRE             | AACCTAA      | 1449 | 7  | - | Petroselinum crispum    | MYB binding site                 |
| CmoCh14G008450 | CAAT-box        | CAAAAT       | 403  | 5  | + | Hordeum vulgare         | MYB binding site                 |
| CmoCh14G008450 | Box 4           | ATTAAT       | 544  | 6  | + | Petroselinum crispum    | light responsiveness             |
| CmoCh14G008450 | Box 4           | ATTAAT       | 610  | 6  | + | Petroselinum crispum    | light responsiveness             |
| CmoCh14G008450 | Box 4           | ATTAAT       | 1235 | 6  | - | Petroselinum crispum    | light responsiveness             |
| CmoCh14G008450 | TCT-motif       | TCTTAC       | 139  | 6  | + | Arabidopsis thaliana    | light responsiveness             |
| CmoCh14G008450 | TCCC-motif      | TCTCCCT      | 49   | 7  | - | Spinacia oleracea       | light responsiveness             |
| CmoCh14G008450 | CAAT-box        | CAAAAT       | 237  | 5  | + | Pisum sativum           | light responsiveness             |
| CmoCh14G008450 | TCCC-motif      | TCTCCCT      | 411  | 7  | - | Spinacia oleracea       | light responsiveness             |
| CmoCh14G017140 | ABRE            | TACGGTC      | 373  | 7  | - | Arabidopsis thaliana    | abscisicacid responsiveness      |
| CmoCh14G017140 | ARE             | AAACCA       | 24   | 6  | + | Zea mays                | anaerobic induction              |
| CmoCh14G017140 | ARE             | AAACCA       | 519  | 6  | + | Zea mays                | anaerobic induction              |
| CmoCh14G017140 | ARE             | AAACCA       | 1684 | 6  | - | Zea mays                | anaerobic induction              |
| CmoCh14G017140 | circadian       | CAAAGATATC   | 241  | 9  | + | Lycopersicon esculentum | circadian control                |
| CmoCh14G017140 | P-box           | CCTTTTG      | 768  | 7  | - | Oryza sativa            | gibberellin responsiveness       |
| CmoCh14G017140 | GT1-motif       | GGTTAA       | 1074 | 6  | + | Arabidopsis thaliana    | light responsiveness             |
| CmoCh14G017140 | MRE             | AACCTAA      | 1943 | 7  | - | Petroselinum crispum    | MYB binding site                 |
| CmoCh14G017140 | ATCT-motif      | AATCTAATCC   | 1296 | 9  | - | Pisum sativum           | light responsiveness             |
| CmoCh14G017140 | I-box           | GTATAAGGCC   | 489  | 9  | + | Petroselinum hortense   | light responsiveness             |
| CmoCh14G017140 | CAAT-box        | CAAAAT       | 1796 | 5  | + | Pisum sativum           | light responsiveness             |
| CmoCh15G007570 | ABRE            | ACGTG        | 217  | 5  | + | Nicotiana glutinos      | abscisicacid responsiveness      |
| CmoCh15G007570 | ABRE            | ACGTG        | 371  | 5  | + | Pisum sativum           | abscisicacid responsiveness      |

|                |             |             |      |    |   |                       |                                |
|----------------|-------------|-------------|------|----|---|-----------------------|--------------------------------|
| CmoCh15G007570 | ABRE        | TACGGTC     | 1923 | 7  | - | Nicotiana glutinosa   | abscisicacid responsiveness    |
| CmoCh15G007570 | ARE         | AAACCA      | 1363 | 6  | - | Arabidopsis thaliana  | anaerobic induction            |
| CmoCh15G007570 | TGA-element | AACGAC      | 662  | 6  | + | Pisum sativum         | auxin responsiveness           |
| CmoCh15G007570 | GCN4_motif  | TGAGTCA     | 1352 | 7  | + | Nicotiana glutinosa   | endosperm expression           |
| CmoCh15G007570 | P-box       | CCTTTTG     | 1421 | 7  | + | Oryza sativa          | gibberellin responsiveness     |
| CmoCh15G007570 | G-box       | CACGAC      | 1560 | 6  | + | Zea mays              | light responsiveness           |
| CmoCh15G007570 | G-box       | CACGAC      | 1571 | 6  | - | Petroselinum hortense | light responsiveness           |
| CmoCh15G007570 | CAT-box     | GCCACT      | 1717 | 6  | - | Arabidopsis thaliana  | meristem expression            |
| CmoCh15G007570 | Box 4       | ATTAAT      | 133  | 6  | + | Petroselinum crispum  | light responsiveness           |
| CmoCh15G007570 | Box 4       | ATTAAT      | 354  | 6  | + | Petroselinum crispum  | light responsiveness           |
| CmoCh15G007570 | Box 4       | ATTAAT      | 547  | 6  | + | Petroselinum crispum  | light responsiveness           |
| CmoCh15G007570 | Box 4       | ATTAAT      | 846  | 6  | + | Petroselinum crispum  | light responsiveness           |
| CmoCh15G007570 | TATA-box    | ATATAT      | 1027 | 6  | - | Brassica napus        | light responsiveness           |
| CmoCh15G007570 | Box 4       | ATTAAT      | 1673 | 6  | - | Petroselinum crispum  | light responsiveness           |
| CmoCh15G007570 | GATA-motif  | AAGGATAAGG  | 879  | 9  | - | Solanum tuberosum     | light responsiveness           |
| CmoCh15G007570 | GA-motif    | ATAGATAA    | 471  | 8  | - | Arabidopsis thaliana  | light responsiveness           |
| CmoCh15G007570 | GA-motif    | ATAGATAA    | 1692 | 8  | - | Arabidopsis thaliana  | light responsiveness           |
| CmoCh15G007570 | AE-box      | AGAAACTT    | 498  | 8  | - | Arabidopsis thaliana  | light responsiveness           |
| CmoCh17G009640 | ABRE        | ACGTG       | 257  | 5  | + | Arabidopsis thaliana  | abscisicacid responsiveness    |
| CmoCh17G009640 | ABRE        | ACGTG       | 429  | 5  | + | Nicotiana glutinosa   | abscisicacid responsiveness    |
| CmoCh17G009640 | ABRE        | ACGTG       | 505  | 5  | + | Arabidopsis thaliana  | abscisicacid responsiveness    |
| CmoCh17G009640 | ARE         | AAACCA      | 381  | 6  | - | Zea mays              | anaerobic induction            |
| CmoCh17G009640 | ARE         | AAACCA      | 657  | 6  | + | Zea mays              | anaerobic induction            |
| CmoCh17G009640 | GT1-motif   | GGTTAA      | 1166 | 6  | + | Arabidopsis thaliana  | light responsiveness           |
| CmoCh17G009640 | GT1-motif   | GGTTAA      | 1240 | 6  | + | Arabidopsis thaliana  | light responsiveness           |
| CmoCh17G009640 | G-Box       | CACGTT      | 256  | 6  | - | Pisum sativum         | light responsiveness           |
| CmoCh17G009640 | G-Box       | CACGTT      | 504  | 6  | - | Pisum sativum         | light responsiveness           |
| CmoCh17G009640 | G-box       | TACGTG      | 428  | 6  | + | Zea mays              | light responsiveness           |
| CmoCh17G009640 | Box 4       | ATTAAT      | 376  | 6  | + | Petroselinum crispum  | light responsiveness           |
| CmoCh17G009640 | Box 4       | ATTAAT      | 559  | 6  | + | Petroselinum crispum  | light responsiveness           |
| CmoCh17G009640 | chs-CMA1a   | TTACTTAA    | 1168 | 8  | - | Daucus carota         | light responsiveness           |
| CmoCh17G009640 | CAAT-box    | CAAAAT      | 1242 | 5  | + | Arabidopsis thaliana  | light responsiveness           |
| CmoCh17G009640 | GATA-motif  | AAGATAAGATT | 286  | 10 | + | Zea mays              | light responsiveness           |
| CmoCh17G009640 | CAAT-box    | CCAAT       | 602  | 5  | + | Nicotiana glutinosa   | light responsiveness           |
| CmoCh17G009640 | TCCC-motif  | TCTCCCT     | 1380 | 7  | + | Spinacia oleracea     | light responsiveness           |
| CmoCh17G009640 | TCT-motif   | TCTTAC      | 786  | 6  | + | Arabidopsis thaliana  | light responsiveness           |
| CmoCh06G014450 | LTR         | CCGAAA      | 5    | 6  | - | Hordeum vulgare       | low-temperature responsiveness |
| CmoCh14G017140 | MBS         | CAACTG      | 5    | 6  | + | Hordeum vulgare       | MYB binding site               |
| CmoCh14G008450 | TGACG-motif | TGACG       | 16   | 5  | - | Hordeum vulgare       | MeJA responsiveness            |
| CmoCh14G008450 | CGTCA-motif | CGTCA       | 16   | 5  | + | Hordeum vulgare       | MeJA responsiveness            |
| CmoCh17G009640 | ABRE        | ACGTG       | 124  | 5  | - | Brassica napus        | abscisicacid responsiveness    |
| CmoCh17G009640 | G-box       | CACGTC      | 124  | 6  | + | Brassica napus        | light responsiveness           |
| CmoCh15G007570 | ABRE        | CACGTG      | 216  | 6  | + | Arabidopsis thaliana  | abscisicacid responsiveness    |
| CmoCh15G007570 | G-box       | CACGTG      | 216  | 6  | + | Arabidopsis thaliana  | light responsiveness           |

|                |             |             |      |    |   |                      |                             |
|----------------|-------------|-------------|------|----|---|----------------------|-----------------------------|
| CmoCh15G007570 | ABRE        | CACGTG      | 370  | 6  | + | Arabidopsis thaliana | abscisicacid responsiveness |
| CmoCh15G007570 | G-box       | CACGTG      | 370  | 6  | + | Arabidopsis thaliana | light responsiveness        |
| CmoCh14G008450 | TGACG-motif | TGACG       | 480  | 5  | + | Hordeum vulgare      | MeJA responsiveness         |
| CmoCh14G008450 | CGTCA-motif | CGTCA       | 480  | 5  | - | Hordeum vulgare      | MeJA responsiveness         |
| CmoCh14G008450 | ABRE        | ACGTG       | 492  | 5  | - | Arabidopsis thaliana | abscisicacid responsiveness |
| CmoCh14G008450 | G-box       | TACGTG      | 492  | 6  | - | Arabidopsis thaliana | light responsiveness        |
| CmoCh14G008450 | Box 4       | ATTAAT      | 570  | 6  | + | Petroselinum crispum | light responsiveness        |
| CmoCh14G017140 | G-box       | CACGAC      | 570  | 6  | - | Petroselinum crispum | light responsiveness        |
| CmoCh01G003900 | TGACG-motif | TGACG       | 691  | 5  | - | Hordeum vulgare      | MeJA responsiveness         |
| CmoCh01G003900 | CGTCA-motif | CGTCA       | 691  | 5  | + | Hordeum vulgare      | MeJA responsiveness         |
| CmoCh08G004920 | CGTCA-motif | CGTCA       | 749  | 5  | + | Pisum sativum        | MeJA responsiveness         |
| CmoCh08G004920 | TGACG-motif | TGACG       | 749  | 5  | - | Pisum sativum        | MeJA responsiveness         |
| CmoCh14G008450 | ABRE        | ACGTG       | 772  | 5  | - | Zea mays             | abscisicacid responsiveness |
| CmoCh14G008450 | G-box       | TACGTG      | 772  | 6  | - | Zea mays             | light responsiveness        |
| CmoCh06G014450 | MBS         | CAACTG      | 793  | 6  | + | Arabidopsis thaliana | MYB binding site            |
| CmoCh08G004920 | Box 4       | ATTAAT      | 793  | 6  | + | Arabidopsis thaliana | light responsiveness        |
| CmoCh14G008450 | ABRE        | CACGTG      | 803  | 6  | + | Arabidopsis thaliana | abscisicacid responsiveness |
| CmoCh14G008450 | G-Box       | CACGTG      | 803  | 6  | + | Arabidopsis thaliana | light responsiveness        |
| CmoCh14G008450 | TGACG-motif | TGACG       | 823  | 5  | + | Hordeum vulgare      | MeJA responsiveness         |
| CmoCh14G008450 | CGTCA-motif | CGTCA       | 823  | 5  | - | Hordeum vulgare      | MeJA responsiveness         |
| CmoCh06G014450 | ATCT-motif  | AATCTAATCC  | 838  | 9  | + | Arabidopsis thaliana | light responsiveness        |
| CmoCh06G014450 | GATA-motif  | AAGATAAGATT | 838  | 10 | - | Arabidopsis thaliana | light responsiveness        |
| CmoCh14G017140 | ABRE        | ACGTG       | 889  | 5  | - | organism             | abscisicacid responsiveness |
| CmoCh14G017140 | G-Box       | CACGTT      | 889  | 6  | + | organism             | light responsiveness        |
| CmoCh01G003900 | ABRE        | CACGTG      | 1326 | 6  | - | Pisum sativum        | abscisicacid responsiveness |
| CmoCh01G003900 | G-Box       | CACGTG      | 1326 | 6  | - | Pisum sativum        | light responsiveness        |
| CmoCh06G014450 | ABRE        | CACGTG      | 1407 | 6  | - | Arabidopsis thaliana | abscisicacid responsiveness |
| CmoCh06G014450 | G-Box       | CACGTG      | 1407 | 6  | - | Arabidopsis thaliana | light responsiveness        |
| CmoCh15G007570 | CGTCA-motif | CGTCA       | 1566 | 5  | + | Arabidopsis thaliana | MeJA responsiveness         |
| CmoCh15G007570 | TGACG-motif | TGACG       | 1566 | 5  | - | Arabidopsis thaliana | MeJA responsiveness         |
| CmoCh01G003900 | Box 4       | ATTAAT      | 1670 | 6  | - | Petroselinum crispum | light responsiveness        |
| CmoCh17G009640 | Box 4       | ATTAAT      | 1670 | 6  | - | Petroselinum crispum | light responsiveness        |
| CmoCh08G004920 | ABRE        | ACGTG       | 1808 | 5  | - | Zea mays             | abscisicacid responsiveness |
| CmoCh08G004920 | G-Box       | CACGTC      | 1808 | 6  | + | Zea mays             | light responsiveness        |
| CmoCh15G007570 | CGTCA-motif | CGTCA       | 1840 | 5  | - | Arabidopsis thaliana | MeJA responsiveness         |
| CmoCh15G007570 | TGACG-motif | TGACG       | 1840 | 5  | + | Arabidopsis thaliana | MeJA responsiveness         |
| CmoCh08G004920 | CGTCA-motif | CGTCA       | 1845 | 5  | + | Hordeum vulgare      | MeJA responsiveness         |
| CmoCh08G004920 | TGACG-motif | TGACG       | 1845 | 5  | - | Hordeum vulgare      | MeJA responsiveness         |
