# Supplementary material for: Genome-Wide Characterization of Glutamine Synthetase Family Genes in Cucurbitaceae and Their Potential Roles in Cold Response and Rootstock-Scion Signaling Communication
Source: MDPI journal article supplement (doi:10.3390/agriculture11111156), 2021-11-18
Supplement: s1 [file s1]

**Supplementary Table S5. Biological process, cellular component and molecular function categories in GO enrichment of CmoGS and CsaGS genes**

| species  | GO ID      | Description                                  | out | pvalue   | p.adjust | Genes                                                                                                    |
|----------|------------|----------------------------------------------|-----|----------|----------|----------------------------------------------------------------------------------------------------------|
| pumpkin  | GO:0005623 | cell                                         | 7   | 0.237932 | 0.31715  | CmoCh01G003900;CmoCh06G014450;CmoCh08G004920;CmoCh14G008450;CmoCh14G017140;CmoCh15G007570;CmoCh17G009640 |
|          | GO:0005737 | cytoplasm                                    | 7   | 0.003611 | 0.054167 | CmoCh01G003900;CmoCh06G014450;CmoCh08G004920;CmoCh14G008450;CmoCh14G017140;CmoCh15G007570;CmoCh17G009640 |
|          | GO:0044434 | chloroplast part                             | 2   | 0.102833 | 0.170895 | CmoCh06G014450;CmoCh14G017140                                                                            |
|          | GO:0032991 | macromolecular complex                       | 2   | 0.700963 | 0.830088 | CmoCh06G014450;CmoCh14G017140                                                                            |
|          | GO:0016020 | membrane                                     | 2   | 0.824279 | 0.951092 | CmoCh06G014450;CmoCh14G017140                                                                            |
|          | GO:0004356 | glutamate-ammonia ligase activity            | 7   | 6.08E-25 | 5.47E-24 | CmoCh01G003900;CmoCh06G014450;CmoCh08G004920;CmoCh14G008450;CmoCh14G017140;CmoCh15G007570;CmoCh17G009640 |
|          | GO:0005524 | ATP binding                                  | 7   | 5.33E-07 | 2.22E-06 | CmoCh01G003900;CmoCh06G014450;CmoCh08G004920;CmoCh14G008450;CmoCh14G017140;CmoCh15G007570;CmoCh17G009640 |
|          | GO:0043168 | anion binding                                | 7   | 4.53E-06 | 6.80E-06 | CmoCh01G003900;CmoCh06G014450;CmoCh08G004920;CmoCh14G008450;CmoCh14G017140;CmoCh15G007570;CmoCh17G009640 |
|          | GO:0017076 | purine nucleotide binding                    | 7   | 1.42E-06 | 2.62E-06 | CmoCh01G003900;CmoCh06G014450;CmoCh08G004920;CmoCh14G008450;CmoCh14G017140;CmoCh15G007570;CmoCh17G009640 |
|          | GO:0006542 | glutamine biosynthetic process               | 7   | 1.13E-24 | 6.70E-23 | CmoCh01G003900;CmoCh06G014450;CmoCh08G004920;CmoCh14G008450;CmoCh14G017140;CmoCh15G007570;CmoCh17G009640 |
|          | GO:0044038 | cell wall macromolecule biosynthetic process | 7   | 1.21E-16 | 6.52E-16 | CmoCh01G003900;CmoCh06G014450;CmoCh08G004920;CmoCh14G008450;CmoCh14G017140;CmoCh15G007570;CmoCh17G009640 |
|          | GO:1901566 | organonitrogen compound biosynthetic process | 7   | 1.25E-07 | 2.53E-07 | CmoCh01G003900;CmoCh06G014450;CmoCh08G004920;CmoCh14G008450;CmoCh14G017140;CmoCh15G007570;CmoCh17G009640 |
|          | GO:0009399 | nitrogen fixation                            | 3   | 1.53E-10 | 4.51E-10 | CmoCh08G004920;CmoCh15G007570;CmoCh17G009640                                                             |
|          | GO:0009735 | response to cytokinin                        | 2   | 0.000792 | 0.001113 | CmoCh06G014450;CmoCh14G017140                                                                            |
| cucumber | GO:0005623 | cell                                         | 4   | 0.409576 | 0.574511 | Csa3G150160;Csa3G304140;Csa5G410730;Csa7G420690                                                          |
|          | GO:0005737 | cytoplasm                                    | 4   | 0.037778 | 0.415781 | Csa3G150160;Csa3G304140;Csa5G410730;Csa7G420690                                                          |
|          | GO:0044434 | chloroplast part                             | 1   | 0.281478 | 0.449357 | Csa3G150160                                                                                              |
|          | GO:0032991 | macromolecular complex                       | 1   | 0.744862 | 0.882074 | Csa3G150160                                                                                              |
|          | GO:0016020 | membrane                                     | 1   | 0.855697 | 0.979854 | Csa3G150160                                                                                              |
|          | GO:0004356 | glutamate-ammonia ligase activity            | 4   | 2.33E-14 | 2.1E-13  | Csa3G150160;Csa3G304140;Csa5G410730;Csa7G420690                                                          |
|          | GO:0005524 | ATP binding                                  | 4   | 0.000277 | 0.000851 | Csa3G150160;Csa3G304140;Csa5G410730;Csa7G420690                                                          |
|          | GO:0043168 | anion binding                                | 4   | 0.000949 | 0.001423 | Csa3G150160;Csa3G304140;Csa5G410730;Csa7G420690                                                          |
|          | GO:0017076 | purine nucleotide binding                    | 4   | 0.000492 | 0.000851 | Csa3G150160;Csa3G304140;Csa5G410730;Csa7G420690                                                          |
|          | GO:0006542 | glutamine biosynthetic process               | 4   | 3.26E-14 | 1.92E-12 | Csa3G150160;Csa3G304140;Csa5G410730;Csa7G420690                                                          |

|            |                                              |   |          |          |                                                 |
|------------|----------------------------------------------|---|----------|----------|-------------------------------------------------|
| GO:0044038 | cell wall macromolecule biosynthetic process | 4 | 7.13E-10 | 4.21E-09 | Csa3G150160;Csa3G304140;Csa5G410730;Csa7G420690 |
| GO:1901566 | organonitrogen compound biosynthetic process | 4 | 9.84E-05 | 0.0002   | Csa3G150160;Csa3G304140;Csa5G410730;Csa7G420690 |
| GO:0009399 | nitrogen fixation                            | 2 | 7.47E-08 | 2.75E-07 | Csa5G410730;Csa7G420690                         |
| GO:0009735 | response to cytokinin                        | 1 | 0.021909 | 0.030062 | Csa3G150160                                     |

---
