# Supplementary material for: Genome-Wide Characterization of Glutamine Synthetase Family Genes in Cucurbitaceae and Their Potential Roles in Cold Response and Rootstock-Scion Signaling Communication
Source: MDPI journal article supplement (doi:10.3390/agriculture11111156), 2021-11-18
Supplement: s1 [file s1]

**Supplementary Table S6. RPKM value of RNA-seq data in different tissues of pumpkin and cucumber**

| species  | accession in<br>NCBI | GENE ID        | Root    | Stem    | Leaf      | fruit             |
|----------|----------------------|----------------|---------|---------|-----------|-------------------|
| pumpkin  | PRJNA385310          | CmoCh14G008450 | 17.47   | 8.52    | 0.7       | 5.56              |
|          |                      | CmoCh15G007570 | 22.793  | 160.51  | 24.405    | 104.08            |
|          |                      | CmoCh01G003900 | 8.717   | 58.633  | 8.75      | 3.733             |
|          |                      | CmoCh17G009640 | 10.613  | 9.667   | 5.055     | 12.457            |
|          |                      | CmoCh08G004920 | 155.233 | 892.317 | 73.08     | 92.85             |
|          |                      | CmoCh06G014450 | 1.203   | 144.05  | 948.96    | 8.44              |
|          |                      | CmoCh14G017140 | 0.973   | 73.213  | 329.615   | 4.767             |
| species  | accession in<br>NCBI | GENE ID        | Root    | Stem    | YoungLeaf | Flesh_3Week_Fruit |
| cucumber | PRJNA312872          | Csa3G150160    | 39.04   | 327.13  | 2272.83   | 9.83              |
|          |                      | Csa3G304140    | 536.43  | 263.23  | 230.59    | 443.65            |
|          |                      | Csa5G410730    | 198.33  | 107.72  | 13.47     | 381.51            |
|          |                      | Csa7G420690    | 370.15  | 241.96  | 195.47    | 1044.58           |
